# Supplementary material for: Deriving and validating a risk prediction model for long COVID-19: protocol for an observational cohort study using linked Scottish data
Source: PubMed Central journal article supplement (PMC9260199; doi:10.1136/bmjopen-2021-059385), 2022-07-06
Supplement: bmjopen-2021-059385supp001.pdf [file bmjopen-2021-059385supp001.pdf]

## Deriving and validating a risk prediction model for long COVID-19: protocol for an observational cohort study using linked Scottish data

### SUPPLEMENTARY FILE

Diagnostic codes for Long COVID

*Local codes introduced in Scotland<sup>1</sup>*

| Clinical Computer System | Code         | Description                  |
|--------------------------|--------------|------------------------------|
| EMIS PCS                 | ^ESCT1348648 | Ongoing symptomatic COVID-19 |
| EMIS PCS                 | ^ESCT1348645 | Post-COVID-19 syndrome       |
| Vision                   | A7955        | Ongoing symptomatic COVID-19 |
| Vision                   | AyuJC        | Post-COVID-19 syndrome       |

*ICD-10 emergency use codes for conditions related to COVID-19<sup>2</sup>*

| ICD-10 Code | Description                                                |
|-------------|------------------------------------------------------------|
| U07.3       | Personal history of COVID-19                               |
| U07.4       | Post-COVID-19 condition                                    |
| U07.5       | Multisystem inflammatory syndrome associated with COVID-19 |

Tripod checklist: Prediction model development and validation<sup>3</sup>

| Section/Topic                | Item | Checklist Item                                                                                                                                                                                            | Page |
|------------------------------|------|-----------------------------------------------------------------------------------------------------------------------------------------------------------------------------------------------------------|------|
| <b>Title and abstract</b>    |      |                                                                                                                                                                                                           |      |
| Title                        | 1    | D;V Identify the study as developing and/or validating a multivariable prediction model, the target population, and the outcome to be predicted.                                                          | 1    |
| Abstract                     | 2    | D;V Provide a summary of objectives, study design, setting, participants, sample size, predictors, outcome, statistical analysis, results, and conclusions.                                               | 2    |
| <b>Introduction</b>          |      |                                                                                                                                                                                                           |      |
| Background and objectives    | 3a   | D;V Explain the medical context (including whether diagnostic or prognostic) and rationale for developing or validating the multivariable prediction model, including references to existing models.      | 4/5  |
|                              | 3b   | D;V Specify the objectives, including whether the study describes the development or validation of the model or both.                                                                                     | 5    |
| <b>Methods</b>               |      |                                                                                                                                                                                                           |      |
| Source of data               | 4a   | D;V Describe the study design or source of data (e.g., randomized trial, cohort, or registry data), separately for the development and validation data sets, if applicable.                               | 5/6  |
|                              | 4b   | D;V Specify the key study dates, including start of accrual; end of accrual; and, if applicable, end of follow-up.                                                                                        | 5/6  |
| Participants                 | 5a   | D;V Specify key elements of the study setting (e.g., primary care, secondary care, general population) including number and location of centres.                                                          | 5/6  |
|                              | 5b   | D;V Describe eligibility criteria for participants.                                                                                                                                                       | 5    |
|                              | 5c   | D;V Give details of treatments received, if relevant.                                                                                                                                                     | NA   |
| Outcome                      | 6a   | D;V Clearly define the outcome that is predicted by the prediction model, including how and when assessed.                                                                                                | 7    |
|                              | 6b   | D;V Report any actions to blind assessment of the outcome to be predicted.                                                                                                                                | NA   |
| Predictors                   | 7a   | D;V Clearly define all predictors used in developing or validating the multivariable prediction model, including how and when they were measured.                                                         | 8    |
|                              | 7b   | D;V Report any actions to blind assessment of predictors for the outcome and other predictors.                                                                                                            | NA   |
| Sample size                  | 8    | D;V Explain how the study size was arrived at.                                                                                                                                                            | 5    |
| Missing data                 | 9    | D;V Describe how missing data were handled (e.g., complete-case analysis, single imputation, multiple imputation) with details of any imputation method.                                                  | 9    |
| Statistical analysis methods | 10a  | D Describe how predictors were handled in the analyses.                                                                                                                                                   | 12   |
|                              | 10b  | D Specify type of model, all model-building procedures (including any predictor selection), and method for internal validation.                                                                           | 12   |
|                              | 10c  | V For validation, describe how the predictions were calculated.                                                                                                                                           | NA   |
|                              | 10d  | D;V Specify all measures used to assess model performance and, if relevant, to compare multiple models.                                                                                                   | NA   |
|                              | 10e  | V Describe any model updating (e.g., recalibration) arising from the validation, if done.                                                                                                                 | NA   |
| Risk groups                  | 11   | D;V Provide details on how risk groups were created, if done.                                                                                                                                             | NA   |
| Development vs. validation   | 12   | V For validation, identify any differences from the development data in setting, eligibility criteria, outcome, and predictors.                                                                           | NA   |
| <b>Results</b>               |      |                                                                                                                                                                                                           |      |
| Participants                 | 13a  | D;V Describe the flow of participants through the study, including the number of participants with and without the outcome and, if applicable, a summary of the follow-up time. A diagram may be helpful. | NA   |
|                              | 13b  | D;V Describe the characteristics of the participants (basic demographics, clinical features, available predictors), including the number of participants with missing data for predictors and outcome.    | NA   |
|                              | 13c  | V For validation, show a comparison with the development data of the distribution of important variables (demographics, predictors and outcome).                                                          | NA   |
| Model development            | 14a  | D Specify the number of participants and outcome events in each analysis.                                                                                                                                 | NA   |
|                              | 14b  | D If done, report the unadjusted association between each candidate predictor and outcome.                                                                                                                | NA   |
| Model specification          | 15a  | D Present the full prediction model to allow predictions for individuals (i.e., all regression coefficients, and model intercept or baseline survival at a given time point).                             | NA   |
|                              | 15b  | D Explain how to use the prediction model.                                                                                                                                                                | NA   |
| Model performance            | 16   | D;V Report performance measures (with CIs) for the prediction model.                                                                                                                                      | NA   |
| Model-updating               | 17   | V If done, report the results from any model updating (i.e., model specification, model performance).                                                                                                     | NA   |
| <b>Discussion</b>            |      |                                                                                                                                                                                                           |      |
| Limitations                  | 18   | D;V Discuss any limitations of the study (such as nonrepresentative sample, few events per predictor, missing data).                                                                                      | NA   |
| Interpretation               | 19a  | V For validation, discuss the results with reference to performance in the development data, and any other validation data.                                                                               | NA   |
|                              | 19b  | D;V Give an overall interpretation of the results, considering objectives, limitations, results from similar studies, and other relevant evidence.                                                        | NA   |
| Implications                 | 20   | D;V Discuss the potential clinical use of the model and implications for future research.                                                                                                                 | NA   |
| <b>Other information</b>     |      |                                                                                                                                                                                                           |      |
| Supplementary information    | 21   | D;V Provide information about the availability of supplementary resources, such as study protocol, Web calculator, and data sets.                                                                         | NA   |
| Funding                      | 22   | D;V Give the source of funding and the role of the funders for the present study.                                                                                                                         |      |

## REFERENCES

- 1) Scottish Government. Management and recording of the long-term effects of COVID-19 (Long COVID). March 2020. Available from: <https://www.scimp.scot.nhs.uk/wp-content/uploads/CMO-Letter-09.03.21.pdf> (Accessed November 2021)
- 2) Public Health Scotland. Scottish Clinical Coding Standards. Number 27. <https://www.isdscotland.org/products-and-services/terminology-services/clinical-coding-guidelines/Docs/Scottish-clinical-coding-standards-Feb-2021-No-27.pdf> (Accessed November 2021)
- 3) Moons KG, Altman DG, Reitsma JB, et al. Transparent Reporting of a multivariable prediction model for Individual Prognosis or Diagnosis (TRIPOD): explanation and elaboration. *Annals of internal medicine*. 2015;162(1):W1-73.
